# Supplementary material for: Anti-Inflammatory Activity of Isomaltodextrin in a C57BL/6NCrl Mouse Model with Lipopolysaccharide-Induced Low-Grade Chronic Inflammation
Source: PubMed Central journal article supplement (PMC6893451; doi:10.3390/nu11112791), 2019-11-15
Supplement: nutrients-11-02791-s001.pdf [file nutrients-11-02791-s001.pdf]

**Supplemental Table S1.** cDNA synthesis thermal cycling conditions

| Settings | Temperature (°C) | Time (min) |
|----------|------------------|------------|
| Step 1   | 25               | 10         |
| Step 2   | 37               | 120        |
| Step 3   | 85               | 5          |
| Step 4   | 4                | ⊙          |

**Supplemental Table S2.** RT-PCR thermal cycling conditions

| Step         | Temperature (°C) | Time (s) |
|--------------|------------------|----------|
| Denaturation | 95               | 15       |
| Annealing    | 56               | 15       |
| Extension    | 72               | 30       |

**Supplemental Table S3.** Primer sequences used in this study for tight junction analysis.

| Mouse gene | Forward primer sequence (5'-3') | Reverse Primer Sequence (5'-3') |
|------------|---------------------------------|---------------------------------|
| GAPDH      | AACTTTGGCATTGTGGAAGG            | GGATGCAGGGATGATGTTCT            |
| Claudin 2  | GGCTGTTAGGCACATCCAT             | TGGCACCAACATAGGAACTC            |
| Claudin 3  | AAGCCGAATGGACAAAGAA             | CTGGCAAGTAGCTGCAGTG             |
| Claudin 4  | CGCTACTCTTGCCATTACG             | ACTCAGCACACCATGACTTG            |
| Occludin   | AAGTCAACACCTCTGGTGCC            | TCATAGTGGTCAGGGTCCGT            |
| JAM-A      | ACCCTCCCTCCTTTCTTAC             | CTAGGACTCTTGCCCAATCC            |
| ZO-1       | AGGACACCAAAGCATGTGAG            | GGCATTCTGCTGGTTACA              |
| Mucin 2    | CGACACCAGGGATTTTCGCTTAAT        | CACTTCCACCCTCCCGGCAAAC          |
| Mucin 4    | CTCCAAGAAATGTAGTGGCTTTCAG       | CACGGTCTTGGGCTGGAGTA            |

**Supplemental Table S4.** Primers used in PCR analysis of microbiota analysis.

| Bacteria            | Forward primer (5'-3') | Reverse primer (5'-3') | Product (bp) | Accession No.            |
|---------------------|------------------------|------------------------|--------------|--------------------------|
| <i>B. bifidum</i>   | cgtcgccttcttctctctct   | tctcaagagctcgtaggcg    | 137          | EF417563                 |
| <i>L. casei</i>     | tcgtgtcgtgagatgttggg   | accttctccggttgtcac     | 113          | EU715321                 |
| <i>E. coli</i>      | gtcacggcaacaatgctgt    | atggccacaacaacgaaagc   | 173          | D78167                   |
| <i>C. difficile</i> | gacccgatgatagcccttcc   | ggtgcgatagtcctgttcc    | 146          | HF930131                 |
| <i>B. fragilis</i>  | gtagagtcatcccttcgcg    | agaactcgacaaccgggac    | 104          | CR626927                 |
| Eubacteria          | actcctacgggaggcagcag   | attaccgcggctgctgg      | 200          | Walter, J., et al., 2006 |



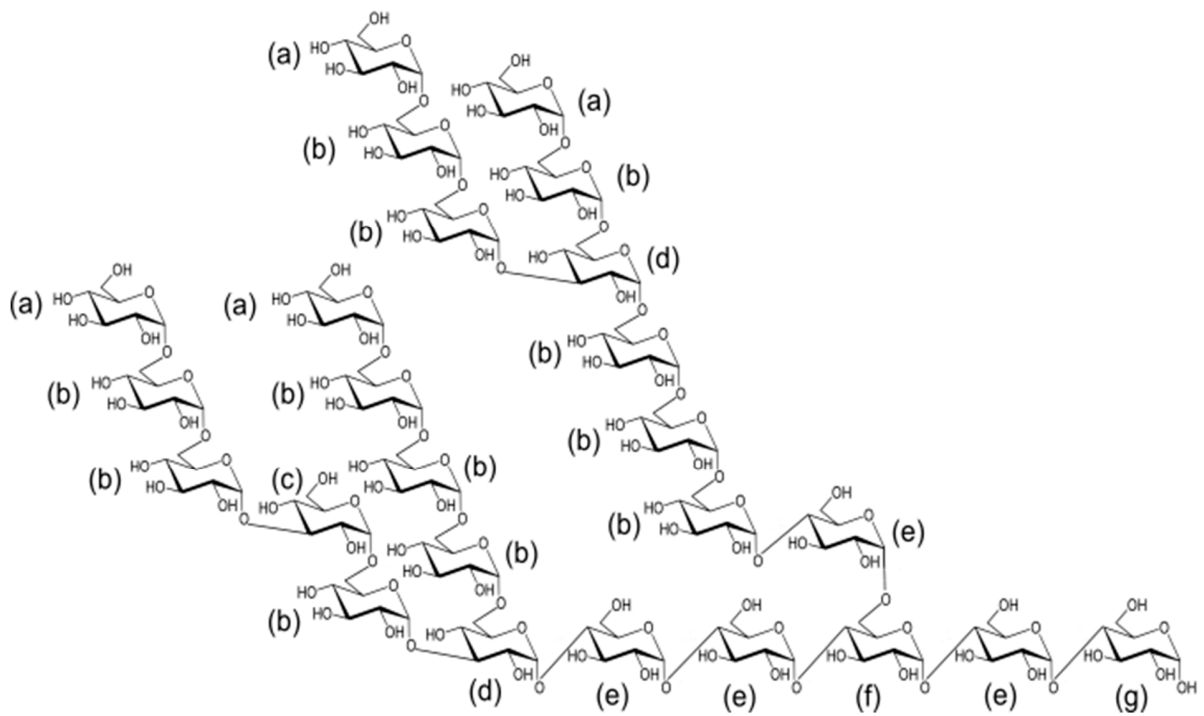

**Supplemental Figure S1.** Putative structure of isomaltodextrin, an  $\alpha$ -glucan resistant to digestion. (a) Nonreducing end  $\alpha$ -D-Glc; (b) 1,6-linked  $\alpha$ -D-Glc; (c) 1,3-linked  $\alpha$ -D-Glc; (d) 1,3,6-linked  $\alpha$ -D-Glc; (e) 1,4-linked  $\alpha$ -D-Glc; (f) 1,4,6-linked  $\alpha$ -D-Glc; (g) reducing end  $\alpha$ -D-Glc.

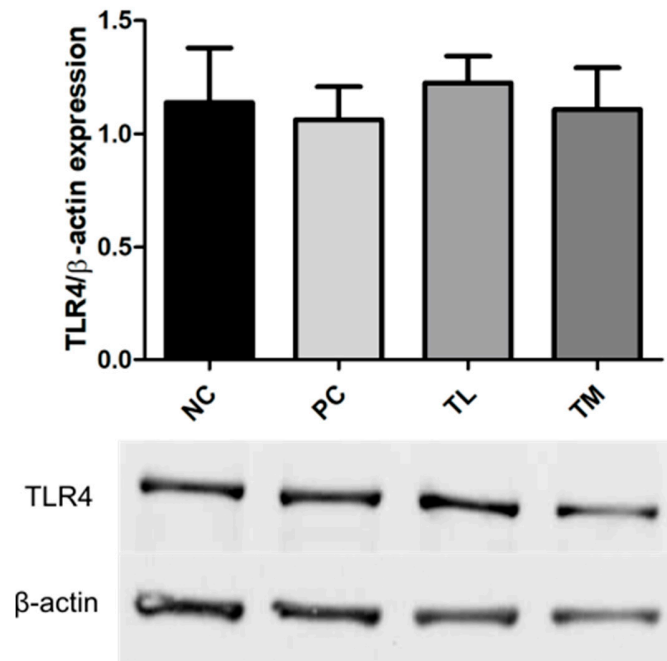

**Supplemental Figure S2.** Effect of IMD on TLR4 expression in white adipose tissue of mice with LPS-induced chronic inflammation, as determined by western blot. Results are expressed as mean  $\pm$  SEM for  $n = 6$  samples per group. Differences in means were considered statistically significant for  $p < 0.05$ .
